# Supplementary material for: mTORC1 Is Transiently Reactivated in Injured Nerves to Promote c-Jun Elevation and Schwann Cell Dedifferentiation
Source: PubMed Central journal article supplement (PMC5956991; doi:10.1523/jneurosci.3619-17.2018), 2018-05-16
Supplement: zns999180787so11.pdf [file zns999180787so11.pdf]

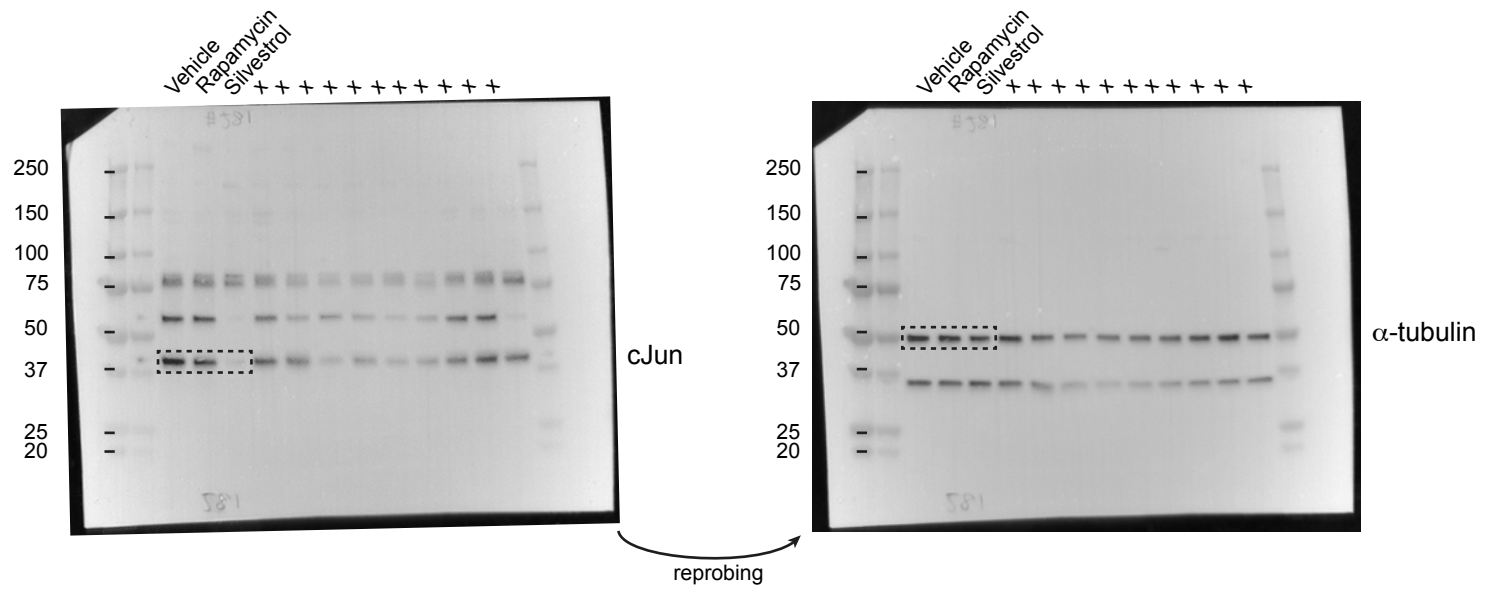

Figure 8-4
